# Supplementary material for: A highly porous, light weight 3D sponge like graphene aerogel for electromagnetic interference shielding applications
Source: Royal Society of Chemistry journal article supplement (doi:10.1039/c5ra19273k), 2015-01-01
Supplement: c5ra19273k1.pdf [file c5ra19273k1.pdf]

## † Electronic Supplementary Information

### **A highly porous, light weight 3D sponge like graphene aerogel for electromagnetic interference shielding applications**

Sweta Singh,<sup>a</sup> Prashant Tripathi,<sup>a</sup> Ashish Bhatnagar,<sup>a</sup> Ch. Ravi Prakash Patel,<sup>a</sup> Avanish Pratap Singh,<sup>b</sup> S. K. Dhawan,<sup>b</sup> Bipin Kumar Gupta<sup>b</sup> and O. N. Srivastava<sup>a,\*</sup>

<sup>1</sup>Nanoscience Centre, Department of Physics (Centre of Advanced Studies), Banaras Hindu University, Varanasi- 221005, India

<sup>2</sup>CSIR- National Physical Laboratory, New Delhi- 110012, India

\**email address:* [heponsphy@gmail.com](mailto:heponsphy@gmail.com) (O. N. Srivastava)

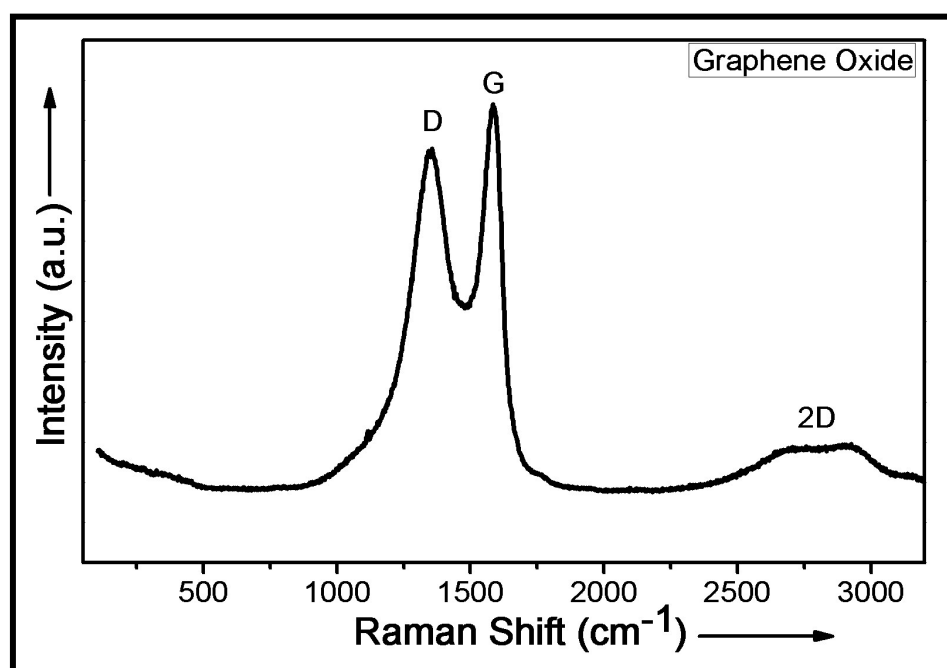

**Fig. S1** Raman spectrum of GO.

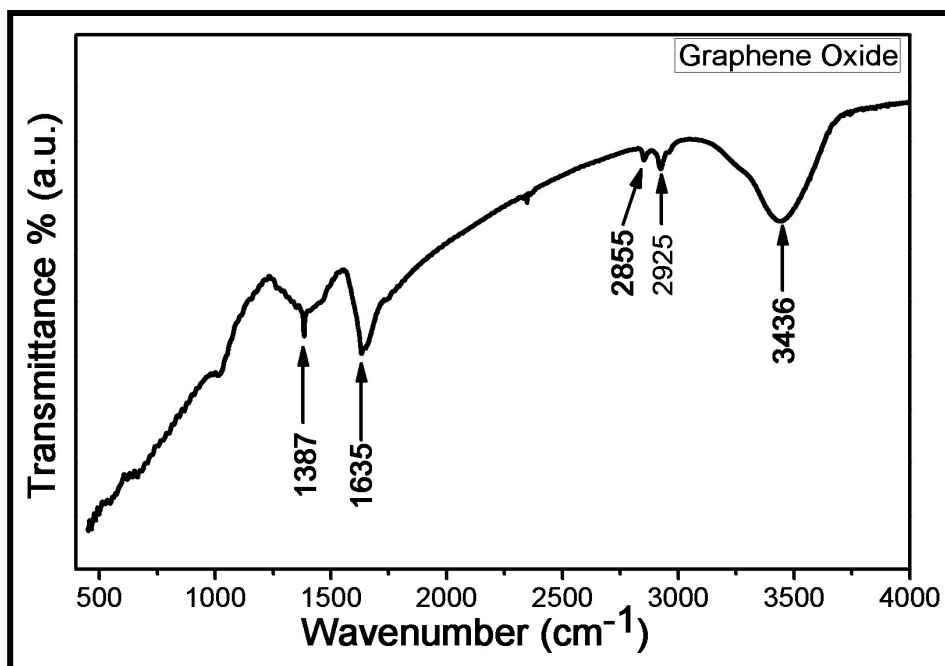

Fig. S2 FTIR spectrum of GO.

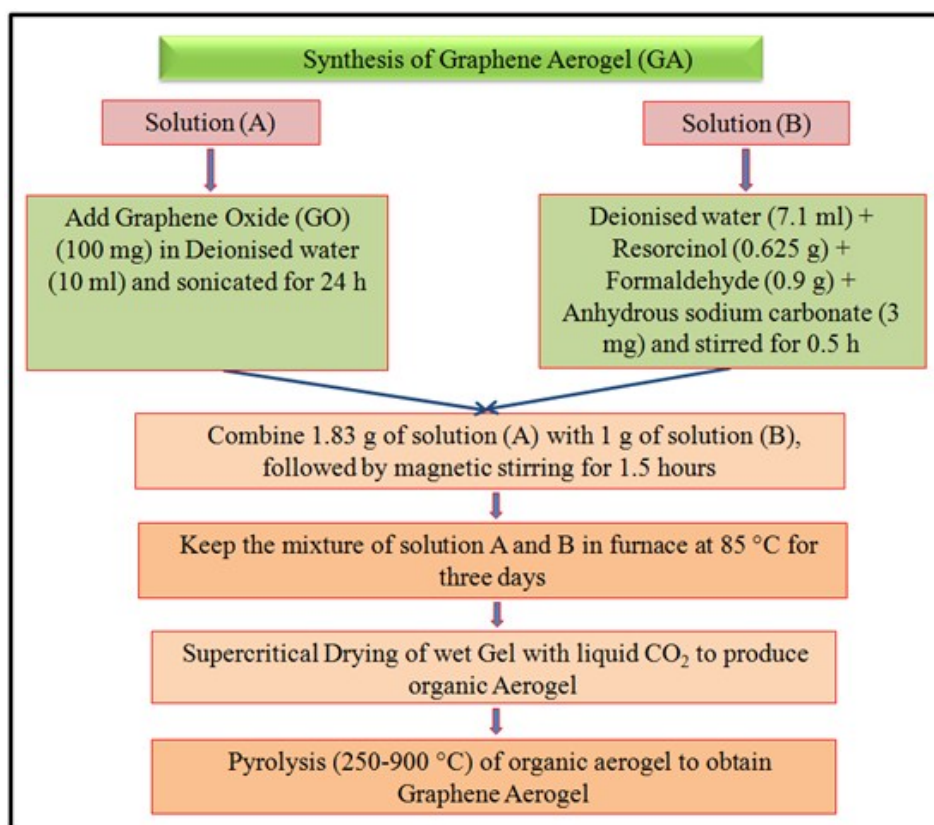

Fig. S3 Schematic representation of synthesis of Graphene Aerogel.

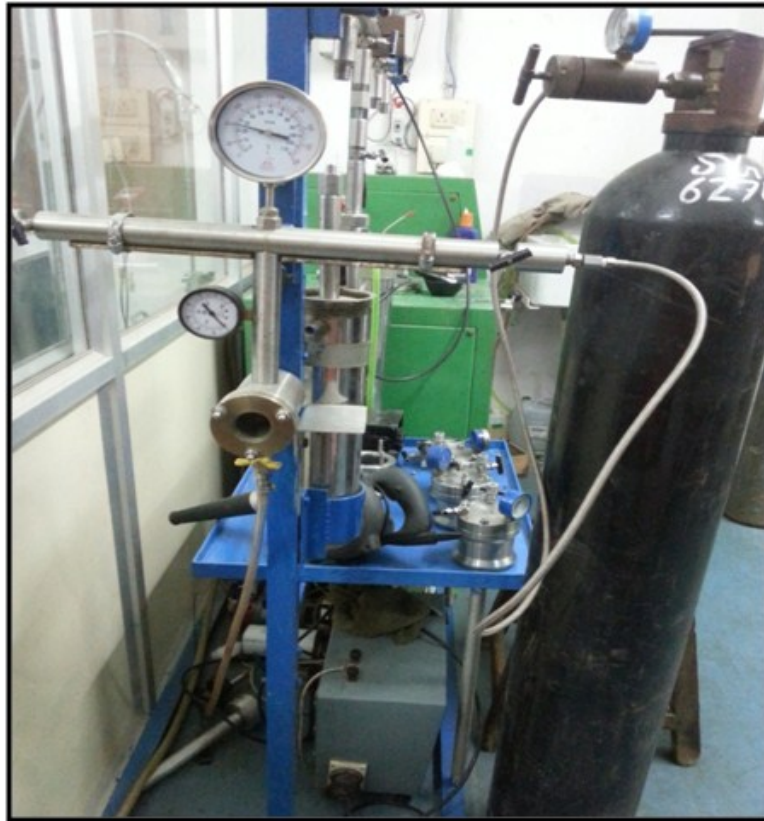

Fig. S4 Locally fabricated Supercritical Dryer.

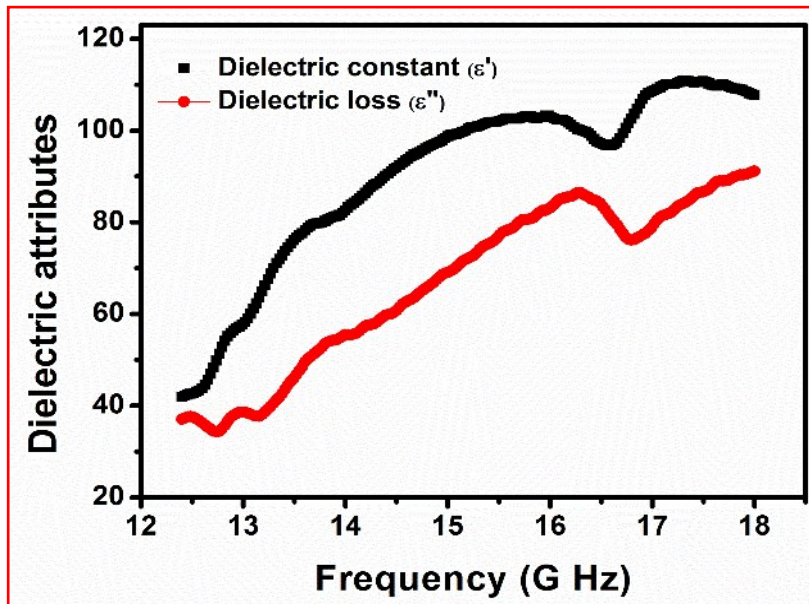

Fig. S5 Real part and imaginary part relative complex permittivity of graphene aerogel in the frequency range 12.4 to 18.0 GHz.

## **Apparent density measurement method**

The apparent density of the GA was calculated by dividing weight by volume. The GA was first cut in the shape of cuboids and weight was measured by electronic balance (least count 0.0001 g). The volume of the GA was calculated simply by multiplying length, breadth and height. The calculated density of the graphene aerogel was obtained to be  $\sim 75$  mg/cm<sup>3</sup>.
